# Supplementary material for: The Multicomponent Medicinal Product Hepar Compositum Reduces Hepatic Inflammation and Fibrosis in a Streptozotocin- and High-Fat Diet-Induced Model of Metabolic Dysfunction-Associated Steatotic Liver Disease/Metabolic Dysfunction-Associated Steatohepatitis
Source: MDPI journal article supplement (doi:10.3390/biomedicines11123216), 2023-12-04
Supplement: s1 [file s1]

## Supplemental table S2: high-fat diet composition

| <b>Formulation (%)</b>                                    |       |
|-----------------------------------------------------------|-------|
| Milk casein                                               | 24.5  |
| Egg white                                                 | 5.0   |
| L-cystine                                                 | 0.43  |
| Powdered beef tallow<br>(including 80% of beef<br>tallow) | 15.88 |
| Safflower oil (high oleic<br>acid)                        | 20.0  |
| Crystalline cellulose                                     | 5.5   |
| Maltodextrin                                              | 8.25  |
| Lactose                                                   | 6.928 |
| Sucrose                                                   | 6.75  |
| AIN93 vitamin mix                                         | 1.4   |
| AIN93G mineral mix                                        | 5.0   |
| Choline bitartrate                                        | 0.36  |
| Tertiary butylhydroquinone                                | 0.002 |
