# Supplementary material for: The Multicomponent Medicinal Product Hepar Compositum Reduces Hepatic Inflammation and Fibrosis in a Streptozotocin- and High-Fat Diet-Induced Model of Metabolic Dysfunction-Associated Steatotic Liver Disease/Metabolic Dysfunction-Associated Steatohepatitis
Source: MDPI journal article supplement (doi:10.3390/biomedicines11123216), 2023-12-04
Supplement: s1 [file s1]

**Supplemental table S1. Composition of HC-24**

| Component                                                                              | Manufacturing method (Ph. Eur.) | µg/ml in HC-24 |
|----------------------------------------------------------------------------------------|---------------------------------|----------------|
| <i>Plant extracts</i>                                                                  |                                 |                |
| <i>Avena sativa</i> L. (Oat), fresh aerial parts                                       | Method 1.1.1                    | 0,02           |
| <i>Chelidonium majus</i> L. (Greater celandine), fresh rhizome and adherent roots      | Method 1.1.5                    | 0,3            |
| <i>Cinchona pubescens</i> (Cinchona), dried bark                                       | Method 1.1.8                    | 10             |
| <i>Cynara scolymus</i> L. (Artichoke), fresh epigeal flowering parts                   | Method 1.1.5                    | 0,03           |
| <i>Lycopodium clavatum</i> L. (Club moss), dried ripe spores                           | Method 1.1.8                    | 10             |
| <i>Silybum marianum</i> (Milk thistle), mature fruit devoid of the pappus of the fruit | Ph. Eur 8.0/1860                | 10             |
| <i>Taraxacum officinale</i> (Dandelion), whole fresh flowering plants                  | Method 1.1.3                    | 2              |
| <i>Veratrum album</i> L (White hellebore), dried rhizome and adherent roots            | Method 1.1.8                    | 10             |
| <i>Chemical substances</i>                                                             |                                 |                |
| α-ketoglutaric acid                                                                    | Method 3.1.1                    | 1E-6           |
| Fumaric acid                                                                           | Method 3.1.1                    | 1E-6           |
| Malic acid                                                                             | Method 3.1.1                    | 1E-6           |
| Orotic Acid Monohydrate                                                                | Method 4.1.1                    | 0,01           |
| Thioctic acid                                                                          | Method 4.1.1                    | 1E-4           |
| Calcium carbonicum Hahnemanni (inner parts of broken shells of the oyster)             | Method 4.1.1                    | 1E-24          |
| Cyanocobalamin (vitamin B12)                                                           | Method 3.1.1                    | 1              |
| Histamin                                                                               | Method 3.1.1                    | 1E-6           |
| Diethyloxalacetate, sodium                                                             | Method 4.1.1                    | 1E-6           |
| Sulphur                                                                                | Method 4.1.1                    | 1E-9           |
| <i>Extracts of organs from healthy pigs</i>                                            |                                 |                |
| Liver                                                                                  | Method 2.1.1                    | 1E-4           |
| Colon                                                                                  | Method 2.1.1                    | 1E-6           |
| Duodenum                                                                               | Method 2.1.1                    | 1E-6           |
| Pancreas                                                                               | Method 2.1.1                    | 1E-6           |
| Thymus                                                                                 | Method 2.1.1                    | 1E-6           |
| Gall bladder                                                                           | Method 2.1.1                    | 1E-6           |

Ph. Eur. = European Pharmacopoeia
